# Supplementary material for: Levels of soluble receptor for AGE are cross-sectionally associated with cardiovascular disease in type 1 diabetes, and this association is partially mediated by endothelial and renal dysfunction and by low-grade inflammation: the EURODIAB Prospective Complications Study
Source: Springer Nature journal article supplement (doi:10.1007/s00125-009-1263-5), 2009-01-29
Supplement: MOESM1 [file 8088182]

## Electronic supplementary material

Members of the EURODIAB Prospective Complications Study group were: B. Karamanos, A. Kofinis and K. Petrou (Hippokration Hospital, Athens, Greece); F. Giorgino, G. Picca, A. Angarano, G. De Pergola, L. Laviola and R. Giorgino (Internal Medicine, Endocrinology and Metabolic Diseases, Department of Emergency and Organ Transplantation, University of Bari, Bari, Italy); C. Ionescu-Tirgoviste, A. Coszma and C. Guja (Clinic of Diabetes, Nutrition and Metabolic Diseases, Bucharest, Romania); M. Songini, A. Casu, M. Pedron, S. Pintus and M. Fossarello (Diabetes Unit Ospedale San Michele, Cagliari, Italy); J. B. Ferriss, G. Grealay and D. O. Keefe (Cork University Hospital, Cork, Ireland); M. Toeller and C. Arden (Diabetes Research Institute, Heinrich-Heine University, Dusseldorf, Germany); R. Rottiers, C. Tuytens and H. Priem (University Hospital of Ghent, Ghent, Belgium); P. Ebeling, M. Kylliäinen and V. A. Koivisto (University Hospital of Helsinki, Helsinki, Finland); B. Idzior-Walus, J. Sieradzki, K. Cyganek and B. Solnica (Department of Metabolic Diseases, Jagiellonian University, Krakow, Poland); H. H. P. J. Lemkes and J. C. Lemkes-Stuffken (Leiden University Medical Centre, the Netherlands); J. Nunes-Correa, M. C. Rogado, L. Gardete-Correia, M. C. Cardoso, A. Silva, J. Boavida and M. Machado Sa Marques (Portuguese Diabetic Association, Lisbon, Portugal); G. Michel, R. Wirion and S. Cardillo (Centre Hospitalier, Luxembourg); G. Pozza, R. Mangili and V. Asnaghi (Ospedale San Raffaele, Milan, Italy); E. Standl, B. Schaffler, H. Brand and A. Harms (City Hospital Schwabing, Munich, Germany); D. Ben Soussan, O. Verier-Mine, P. Fallas and M. C. Fallas (Centre Hospitalier de Valenciennes, France); J. H. Fuller, J. Holloway, L. Asbury and D. J. Betteridge (University College London, London, UK); G. Cathelineau, A. Bouallouche and B. Villatte Cathelineau (Hospital Saint-Louis, Paris, France); F. Santeusano, G. Rosi, V. D'Alessandro, C. Cagini, P. Bottini and G. P. Reboldi (Dipartimento di Medicina Interna, Perugia, Italy); R. Navalesi, G. Penno, S. Bandinelli, R. Miccoli and M. Nannipieri (Dipartimento di Endocrinologia e Metabolismo, Pisa, Italy); G. Ghirlanda, C. Saponara, P. Cotroneo, A. Manto and A. Minnella (Università Cattolica del Sacro Cuore, Rome, Italy); J. D. Ward, S. Tesfaye, S. Eaton and C. Mody (Royal Hallamshire Hospital, Sheffield, UK); M. Borra, P. Cavallo Perin, S. Giunti, G. Grassi, G. F. Pagano, M. Porta, R. Sivieri, F. Vitelli and M. Veglio (Dipartimento di Medicina Interna, Università di Torino and ASO CTO/CRF/Maria Adelaide, Turin, Italy); N. Papazoglou and G. Manes (General Hospital Papageorgiou of Thessaloniki, Greece); M. Muggeo and M. Iagulli (Vittorio Cacciatori, V Cattedra di Malattie del Metabolismo,

Verona, Italy); K. Irsigler and H. Abrahamian (Hospital Vienna Lainz, Austria); S. Walford, J. Sinclair, S. Hughes, V. McLelland and J. Ward (New Cross Hospital, Wolverhampton, UK); and G. Roglic, Z. Metelko and Z. R. Pepeonik (Vuk Vrhovac Institute for Diabetes, Zagreb, Croatia).

Steering Committee members were: J. H. Fuller (London, UK); B. Karamanos, Chairman (Athens, Greece); A.-K. Sjolie (Aarhus, the Netherlands); N. Chaturvedi (London, UK); M. Toeller (Dusseldorf, Germany); G. Pozza, Co-chairman (Milan, Italy); B. Ferriss (Cork, Ireland); M. Porta (Turin, Italy); R. Rottiers (Ghent, Belgium); and G. Michel (Luxembourg).

Coordinating Centre members were: J. H. Fuller, N. Chaturvedi, J. Holloway, D. Webb and L. Asbury (University College London, London, UK).

Central Laboratories members were: G. C. Viberti, R. Swaminathan, P. Lumb, A. Collins and S. Sankaralingham (Guy's and St Thomas' Hospital, London, UK).

Retinopathy Grading Centre members were: S. Aldington, T. Mortemore and H. Lipinski (Royal Postgraduate Medical School of Imperial College London, London, UK).
